# Supplementary material for: Halogen-bond interactions: a crystallographic basicity scale towards iodoorganic compounds
Source: Royal Society of Chemistry journal article supplement (doi:10.1039/c2ce26749g), 2013-01-01
Supplement: c2ce26749g.pdf [file c2ce26749g.pdf]

## Supplementary Information

### Halogen-bond interactions: a crystallographic basicity scale towards iodoorganic compounds.

Jean-Yves Le Questel, Christian Laurence and Jérôme Graton

|                                                                                     | $V_{s,max} / \text{kJ mol}^{-1}$ | $d_{i...N} / \text{Å}$ |                                                                                      | $V_{s,max} / \text{kJ mol}^{-1}$ | $d_{i...N} / \text{Å}$ |
|-------------------------------------------------------------------------------------|----------------------------------|------------------------|--------------------------------------------------------------------------------------|----------------------------------|------------------------|
| ICI                                                                                 | 188.6                            | 2.246                  | 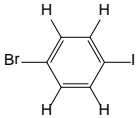   | 88.8                             | 2.812                  |
|    | 135.7                            | 2.667                  |    | 112.1                            | 2.817                  |
|    | 139.9                            | 2.693                  |    | 102.2                            | 2.848                  |
|  | 130.4                            | 2.702                  |  | 115.6                            | 2.872                  |
|  | 132.4                            | 2.744                  |  | 98.4                             | 2.88                   |
|  | 126.0                            | 2.766                  |  | 87.1                             | 2.909                  |
|  | 121.5                            | 2.768                  |  | 83.6                             | 2.926                  |
